# Supplementary material
Source: publisher figshare collection journal article supplement (https://acs.figshare.com/ndownloader/files/5639709)
Supplement: Supplementary file 1 [file 5639709]

# Supporting Information

## Mesocarbon Microbead Carbon Supported Magnesium Hydroxide

### Nanoparticles: Turning Spent Li-ion Battery Anode into a Highly Efficient

#### Phosphate Adsorbent for Wastewater Treatment

Yan Zhang,<sup>1,2</sup> Xingming Guo,<sup>1,2</sup> Feng Wu,<sup>1,2</sup> Ying Yao,<sup>1, 2\*</sup> Yifei Yuan,<sup>3,4</sup> Xuanxuan Bi,<sup>3,5</sup> Xiangyi Luo,<sup>6</sup> Reza Shahbazian-Yassar,<sup>4</sup> Cunzhong Zhang,<sup>1, 2</sup> and Khalil Amine<sup>3</sup>

*1. School of Materials Science and Engineering, Beijing Key Laboratory of Environmental*

*Science and Engineering, Beijing Institute of Technology, Beijing 100081, China*

*2. National Development Center of High Technology Green Materials, Beijing 100081, China*

*3. Chemical Sciences and Engineering Division, Argonne National Laboratory, 9700 South Cass Avenue, Lemont, IL 60439, USA*

*4. Materials Science and Engineering Department, Michigan Technological University, 1400 Townsend Dr., Houghton, MI 49931, USA*

*5. Department of Chemistry and Biochemistry, The Ohio State University, 100 West 18th Avenue, Columbus, OH 43210, USA*

*6. Materials Science Division, Argonne National Laboratory, Lemont, IL 60439, USA*

Corresponding Authors

\*Dr. Ying Yao. Email: yaoying@bit.edu.cn. Tel: 86-10-68912657.

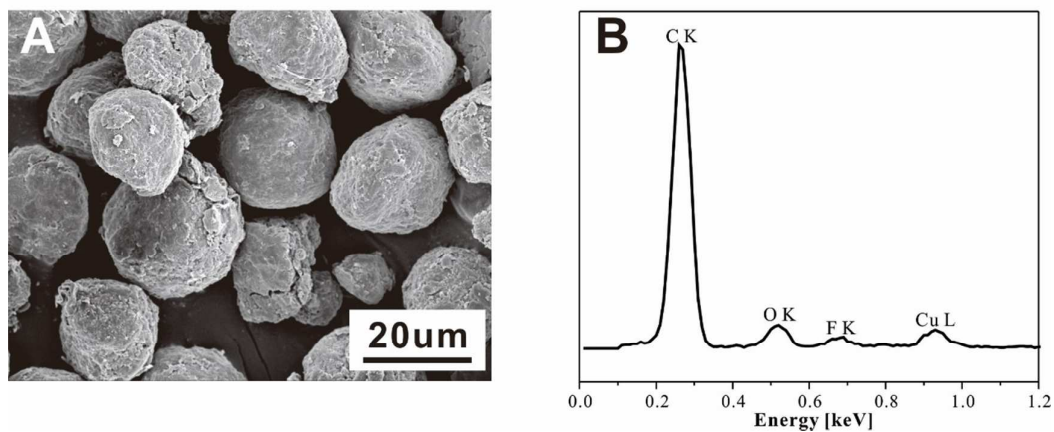

**Figure S1.** SEM images and corresponding EDX spectra of the MCMB.

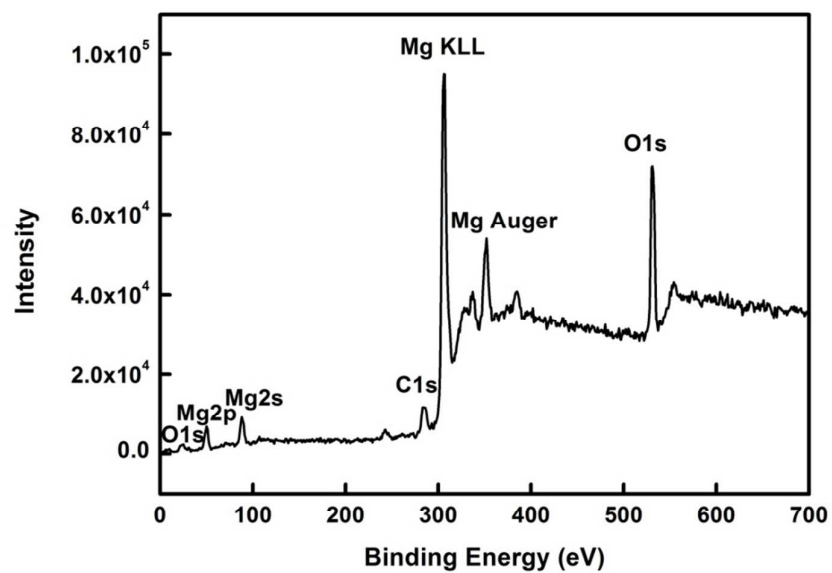

**Figure S2.** XPS spectra for the Mg-MCMB.

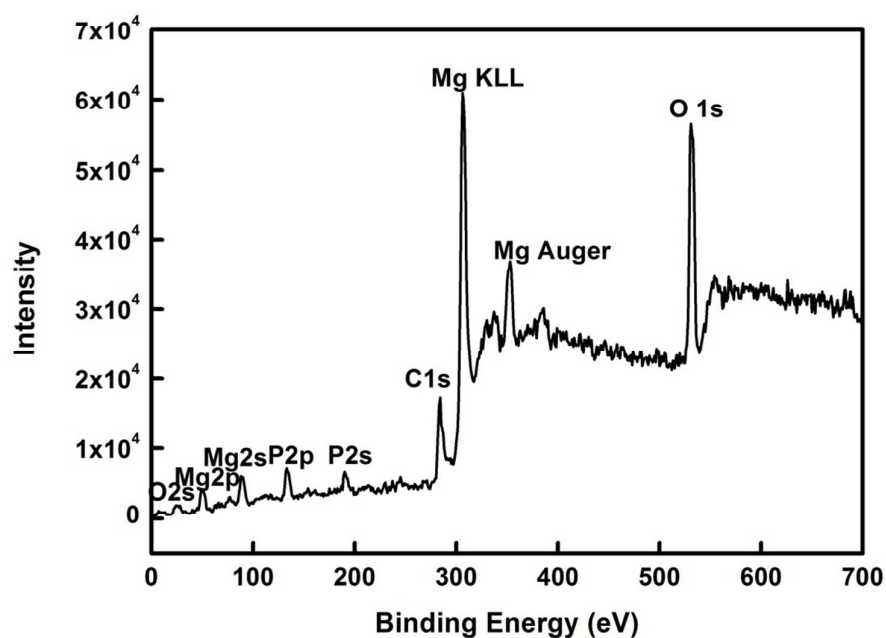

**Figure S3.** XPS spectra for the post-sorption Mg-MCMB.

Table S1. Elemental compositions of post-sorption solution.

| Solution      | Concentration (mg/L) |    |    |       |    |    |    |    |    |      |    |    |    |    |
|---------------|----------------------|----|----|-------|----|----|----|----|----|------|----|----|----|----|
|               | K                    | Na | Ca | Mg    | Fe | Zn | Mn | Co | Ni | Cu   | Li | Pb | Cd | Cr |
| Post-sorption | 578.55               | -  | -  | 13.37 | -  | -  | -  | -  | -  | 0.05 | -  | -  | -  | -  |

## SM 1. Adsorption kinetic models

Pseudo first-order, pseudo second-order model, Ritchie N<sub>th</sub>-order, Elovich, Intraparticle diffusion were used to fit the adsorption kinetic data<sup>1</sup>.

The first-order describe the kinetics of the solid-solution system based on mononuclear adsorption.

$$\frac{dq_t}{dt} = k_1(q_e - q_t) \quad (1), \text{ first-order}$$

where  $(1/h)$  is the rate constant of the pseudo first-order model of adsorption;  $t(h)$  is the adsorption time,  $q_e$  (mg/g) and  $q_t$  (mg/g) is the absorbed amount of phosphate at equilibrium and at different time, respectively.

The second-order describe the kinetics of the solid-solution system based on binuclear adsorption, and the rate-limiting step may be chemical sorption or chemisorption involving valence forces.

$$\frac{dq_t}{dt} = k_2(q_e - q_t)^2 \quad (2), \text{ second-order}$$

where  $k_2$  (g/(mg·h)) is the rate constant of the pseudo first-order model of adsorption, while  $q_e$  and  $q_t$  are defined the same as the parameters in the pseudo first-order model.

Ritchie N<sub>th</sub>-order models describe the kinetics of the solid-solution system based on N-nuclear adsorption.

$$\frac{dq_t}{dt} = k_n(q_e - q_t)^n \quad (3), \text{ Ritchie N}_{th}\text{-order}$$

where  $k_n$  (g<sup>n-1</sup>/(mg<sup>n-1</sup> h)) is the rate constant of the Ritchie N<sub>th</sub>-order model of adsorption; while  $q_e$  and  $q_t$  are defined the same as the parameters in the pseudo first-order model.

The Elovich model is an empirical equation considering the contribution of desorption.

$$\frac{dq_t}{dt} = \alpha \exp(-\beta q_t) \quad (4), \text{ Elovich}$$

where  $\alpha$  (mg/(g h)) is the initial adsorption rate; and  $\beta$  (g/mg) is the desorption constant of the Elovich model. while  $q_t$  are defined the same as the parameters in the pseudo first-order model.

Intraparticle diffusion model assume that the adsorption process is controlled by the pore diffusion as well as the external mass transfer in the sorbent<sup>2</sup>.

$$q_t = k_i t^{1/2} + C_i \quad (5), \text{ intraparticle diffusion}$$

where  $k_i$  (mg g<sup>-1</sup> h<sup>-1/2</sup>) is the intraparticle diffusion rate constant;  $C_i$  (mg/g) is a constant in the intraparticle diffusion equation, corresponding to the thickness of boundary layer. While  $q_t$  is defined the same as the parameter in the pseudo first-order model.

## SM 2. adsorption isotherms models

For phosphate, Langmuir, Freundlich, Langmuir-Freundlich, Toth, dual-mode and BET models were used to fit the adsorption data<sup>3, 4</sup>.

Langmuir equation (Langmuir, 1916; Weber, 1972) is applicable for single-layer adsorption and provides information on maximum uptake capabilities<sup>5</sup>.

$$q_e = \frac{KQ C_e}{1 + K C_e} \quad (6), \text{ Langmuir}$$

where  $K$  (L/mg) represent the Langmuir models' coefficients;  $Q$  (mg/g) is the maximum adsorption capacity of phosphate (mg/g);  $q_e$  is the equilibrium phosphate uptake (mg/g),  $C_e$  is the aqueous phosphate concentration (mg/L).

The Freundlich equation (Freundlich, 1906; Weber, 1972) does not indicate an equilibrium uptake capacity of the adsorbent and is suited for heterogeneous

adsorption. Therefore, it can only reasonably be applied in the low to intermediate concentration range<sup>5</sup>.

$$q_e = K_f C_e^n \quad (7), \text{ Freundlich}$$

where  $K_f (\text{mg}^{1-n} \text{ L}^n / \text{g})$  is the Freundlich affinity coefficient,  $n$  is the exponential coefficient, while  $q_e$  and  $C_e$  are defined the same as the parameters in the Langmuir model.

The Langmuir-Freundlich equation (Sips, 1948) is a combined form of Langmuir and Freundlich models derived for predicting the heterogeneous adsorption systems (Foo and Hameed, 2010). At low concentrations, this equation effectively reduces to a Freundlich isotherm and thus, does not obey Henry's law. At high adsorbate concentrations, it predicts a monolayer sorption capacity characteristic of Langmuir isotherm.<sup>5</sup>

$$q_e = \frac{K_{if} Q C_e^n}{1 + K_{if} C_e^n} \quad (8), \text{ Langmuir-Freundlich}$$

where  $K_{if} (\text{L}^n / \text{mg}^n)$  is the constants for Langmuir-Freundlich isotherm models,  $n$  is the exponential coefficient. While  $q_e$  and  $C_e$  are defined the same as the parameters in the Langmuir model.

The Toth isotherm model (Toth, 1971) is an improved Langmuir isotherm model useful in describing heterogeneous adsorption systems satisfying both low and high-end boundary of the concentration (Foo and Hameed, 2010)<sup>5, 6</sup>.

$$q_e = \frac{K_T C_e}{(1 + B_T C_e^n)^{1/n}} \quad (9), \text{ Toth}$$

where  $K_T (\text{L/g})$ ,  $B_T (\text{L}^n / \text{mg}^n)$  and  $n$  are the Toth constants. While  $q_e$  and  $C_e$  are defined the same as the parameters in the Langmuir model.

Dual-mode model that incorporates precipitation and adsorption (ion exchange and surface complexation)<sup>7, 8</sup>.

$$q_e = \frac{bQ C_e}{1+bC_e} + K_D C_e \quad (10), \text{ Dual-mode}$$

where  $K_D$  (L/mg) is the partitioning coefficient, and  $b$  (L/g) and  $Q$  (mg/g) are the Langmuir affinity constant and maximum sorption capacity, respectively. While  $q_e$  and  $C_e$  are defined the same as the parameters in the Langmuir model.

BET model<sup>9</sup>:

$$q_e = \frac{Q K_S C_e}{(1-K_B C_e) (1-K_B C_e + K_S C_e)} \quad (11), \text{ BET}$$

where  $Q$  (mg/g) is the maximum adsorption capacity of the adsorbents,  $K_S$  (L/mg) is the equilibrium constant of sorption for 1st layer in Langmuir and BET isotherms.  $K_B$  (L/mg) is the equilibrium constant of adsorption for upper layers in BET isotherm. While  $q_e$  and  $C_e$  are defined the same as the parameters in the Langmuir model.

## References

1. Yao, Y.; Gao, B.; Inyang, M.; Zimmerman, A. R.; Cao, X.; Pullammanappallil, P.; Yang, L., Removal of Phosphate from Aqueous Solution by Biochar Derived from Anaerobically Digested Sugar Beet Tailings. *J. Hazard. Mater.* **2011**, *190*, (1-3), 501-7.
2. Yu, Y.; Chen, J. P., Key Factors for Optimum Performance in Phosphate Removal from Contaminated Water by A Fe-Mg-La Tri-Metal Composite Sorbent. *J. Colloid Interface Sci.* **2015**, *445*, 303-311.
3. Yao, Y.; Gao, B.; Wu, F.; Zhang, C.; Yang, L., Engineered Biochar from Biofuel Residue: Characterization and Its Silver Removal Potential. *ACS Appl. Mater. Interfaces* **2015**, *7*, (19), 10634-10640.
4. Wang, J.; Chen, Z.; Chen, B., Adsorption of Polycyclic Aromatic Hydrocarbons by Graphene and Graphene Oxide Nanosheets. *Environ. Sci. Technol.* **2014**, *48*, (9),

4817-4825.

5. Mohan, D.; Kumar, S.; Srivastava, A., Fluoride Removal from Ground Water Using Magnetic and Nonmagnetic Corn Stover Biochars. *Ecol. Eng.* **2014**, *73*, 798-808.
6. Mohan, D.; Singh, P.; Sarswat, A.; Steele, P. H.; Pittman, C. U., Jr., Lead Sorptive Removal Using Magnetic and Nonmagnetic Fast Pyrolysis Energy Cane Biochars. *J. Colloid Interface Sci.* **2015**, *448*, 238-50.
7. Gong, Y.; Liu, Y.; Xiong, Z.; Zhao, D., Immobilization of Mercury by Carboxymethyl Cellulose Stabilized Iron Sulfide Nanoparticles: Reaction Mechanisms and Effects of Stabilizer and Water Chemistry. *Environ. Sci. Technol.* **2014**, *48*, (7), 3986-3994.
8. Tang, J.; Lv, H.; Gong, Y.; Huang, Y., Preparation and Characterization of A Novel Graphene/Biochar Composite for Aqueous Phenanthrene and Mercury Removal. *Bioresour. Technol.* **2015**, *196*, 355-363.
9. Ebadi, A.; Mohammadzadeh, J. S. S.; Khudiev, A., What is the Correct Form of BET Isotherm for Modeling Liquid Phase Adsorption? *Adsorption* **2009**, *15*, (1), 65-73.
